# Supplementary material for: Comprehensive genomic characterization of HER2-low and HER2-0 breast cancer
Source: PubMed Central journal article supplement (PMC10657399; doi:10.1038/s41467-023-43324-w), 2023-11-18
Supplement: 41467_2023_43324_MOESM1_ESM.pdf [file 41467_2023_43324_MOESM1_ESM.pdf]

## SUPPLEMENTARY INFORMATION:

### Comprehensive genomic characterization of HER2-low and HER2-0 breast cancer

P. Tarantino, H. Gupta, M.E.Hughes<sup>1</sup>, J. Files, S.Strauss, G. Kirkner, A.-M. Feeney, Y. Li, A.C.Garrido-Castro, R. Barroso-Sousa, B.L. Bychkovsky, S. DiLascio, L. Sholl, L. MacConaill, N. Lindeman, B.E. Johnson, M. Meyerson, R. Jeselsohn, X. Qiu, R. Li, H. Long, E.P. Winer, D. Dillon, G. Curigliano, A.D. Cherniack, S.M. Tolaney, and N.U. Lin

#### This supplement contains the following information:

- **Supplementary Fig. 1.** REMARK diagram.
- **Supplementary Fig. 2.** Frequency of most common mutations (A) and copy number variations (B) among patients with metastatic disease at time of sample collection (n=801), divided by HER2-status and colored by ER status.
- **Supplementary Fig. 3.** Enrichment analysis of mutations (A) and copy number variation (CNV, B) among patients with metastatic disease at time of tissue collection (N=801).
- **Supplementary Fig. 4.** Comparison of ERBB2 copy counts between HER2-low and HER2-0 tumors among patients with metastatic disease at time of tissue collection (N=801).
- **Supplementary Fig. 5.** Frequency of most common mutations (A) and copy number variations (B) among patients with that were either IHC 0 or 2+ at time of sample collection (N = 759), divided by IHC (HER2) status and colored by ER status
- **Supplementary Fig. 6.** Enrichment analysis of mutations (A) and copy number variation (CNV, B) among patients with either IHC 0 or 2+ at time at time of tissue collection (N = 750).
- **Supplementary Fig. 7.** A plot of total TMB versus TMB that only resulted in an oncogenic mutation, colored by hypermutant status.
- **Supplementary Table 1.** Extended patient and tumor characteristics among patients with metastatic breast cancer included in the study.
- **Supplementary Table 2.** List of tumor suppressor genes that are further used to classify oncogenic mutations.
- **Supplementary Data File (attached Excel file).** Results of enrichment logistic regression. Included q-values were calculated separately for mutation<sup>1</sup>and copy number events.

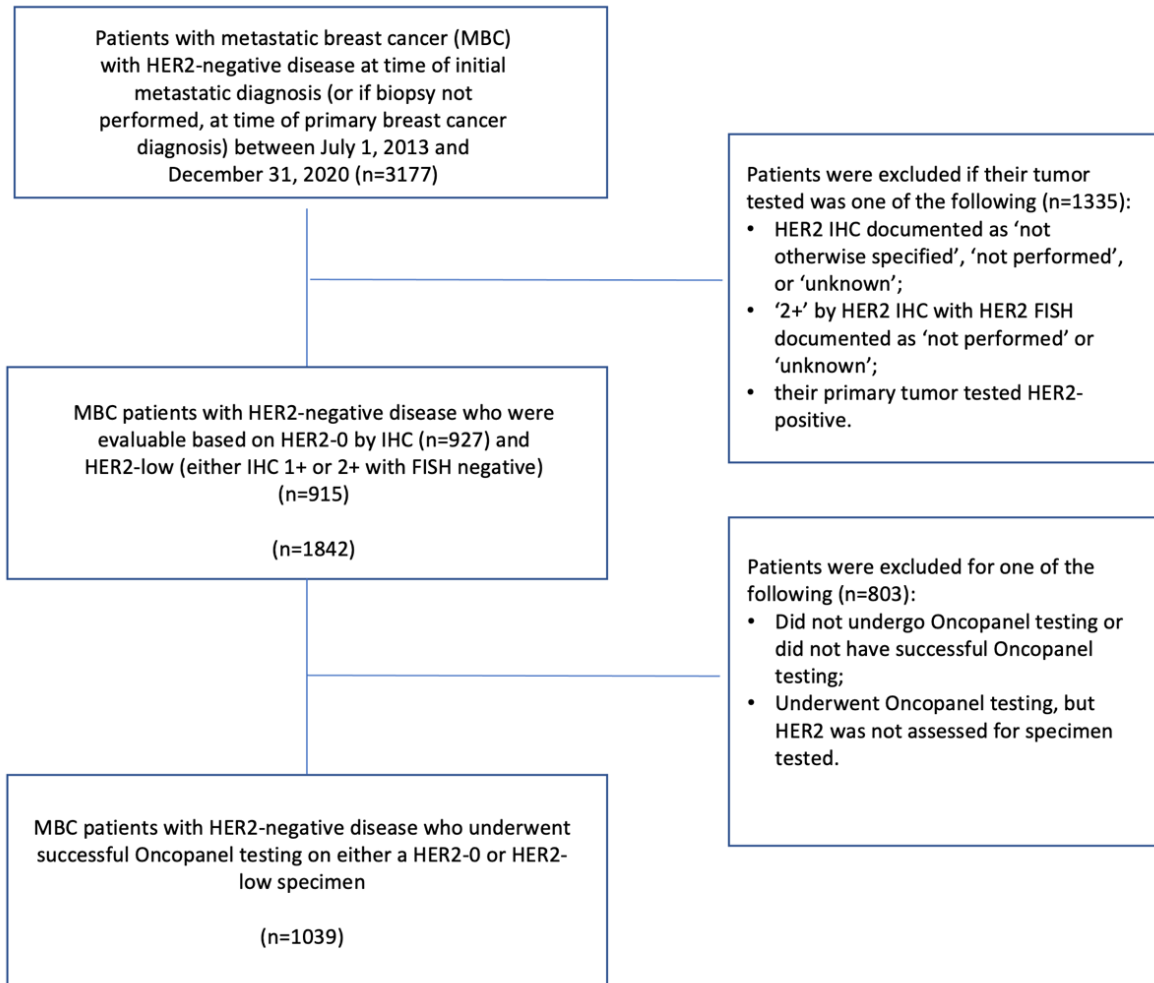

### Supplementary Fig. 1. REMARK diagram

HER2, human epidermal growth factor receptor 2; IHC, immunohistochemistry

**A**

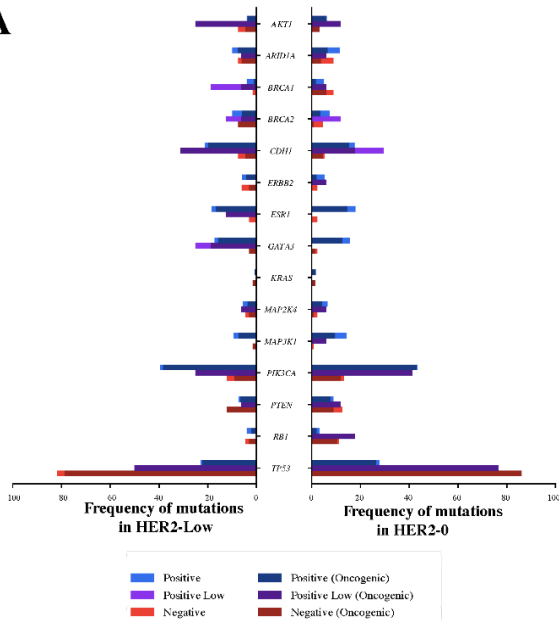

**B**

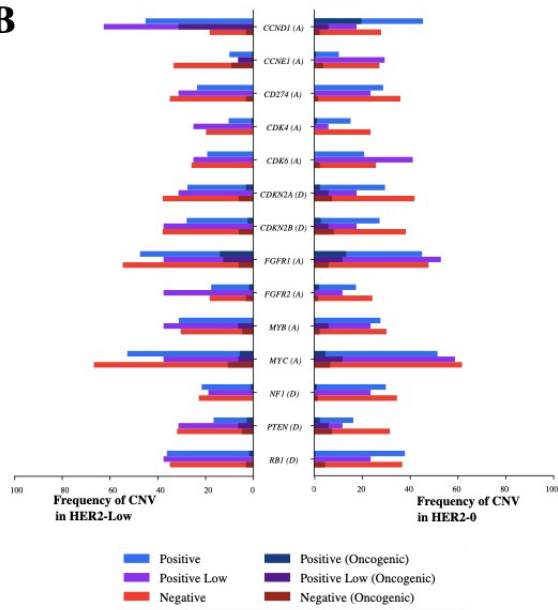

**Supplementary Fig. 2. Frequency of most common mutations (A) and copy number variations (B) among patients with metastatic disease at time of sample collection (N = 801), divided by HER2-status and colored by ER status.**

Shading represents the percentage of oncogenic events. In the right panel, an annotation of "(A)" beside a gene represents high amplification and "(D)" represents a deep or 2 copy deletion.

**HER2**, human epidermal growth factor receptor 2; **ER**, estrogen receptor

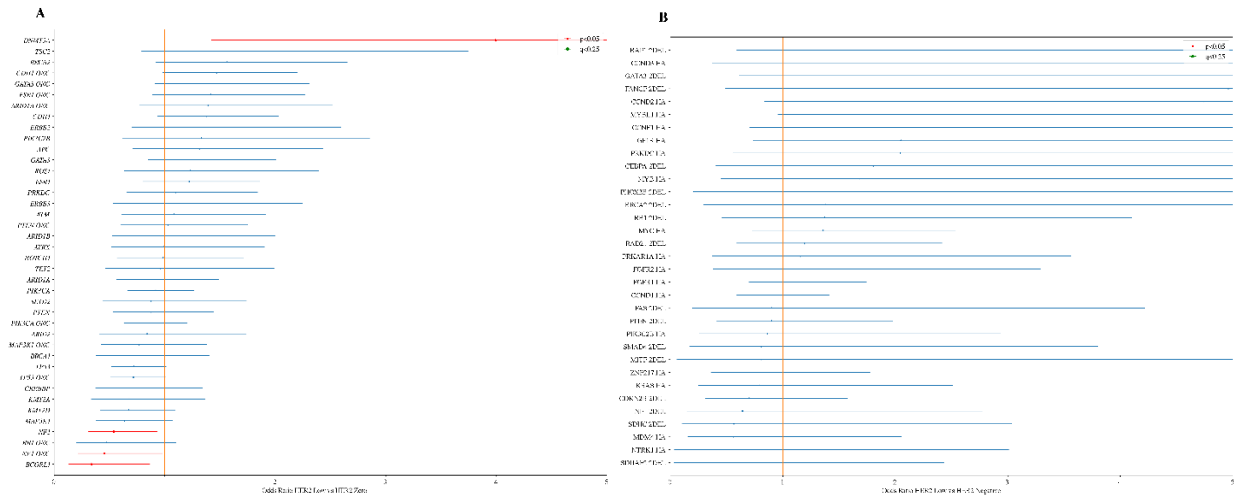

**Supplementary Fig. 3. Enrichment analysis of mutations (A) and copy number variation (CNV, B) among patients with metastatic disease at time of tissue collection (N = 801).**

Modeling was done using multivariate logistic regression accounting for ER status and background rate of either mutation or copy-number events, using the statsmodel package in Python. ER-low cases were included in the ER-positive group. Multiple hypothesis correction was done using FDR. Only models that reached a significant value under multiple hypothesis correction for rejecting the log-likelihood null were included, as well as those that converged after 500 iterations. Only mutations that appeared in over 4% of either all HER2-0 or HER2-low samples were included in this visualization. On the left, lines labeled “\_ONC” represent only oncogenic mutations, while the CNVs were done on 2DELS or high amplifications for tumor suppressor genes and oncogenes, respectively (labeled on the figure). Error bars are reported as the 95% confidence interval. P-values are determined as the likelihood of the model’s calculated coefficients under the assumption that the true coefficients are 0 and are reported as two-tailed. Multiple hypothesis correction was done using BH-FDR. Exact p-values are reported in the source data of this figure.

**CNV**, copy number variations; **ER**, estrogen receptor; **HER2**, human epidermal growth factor receptor 2

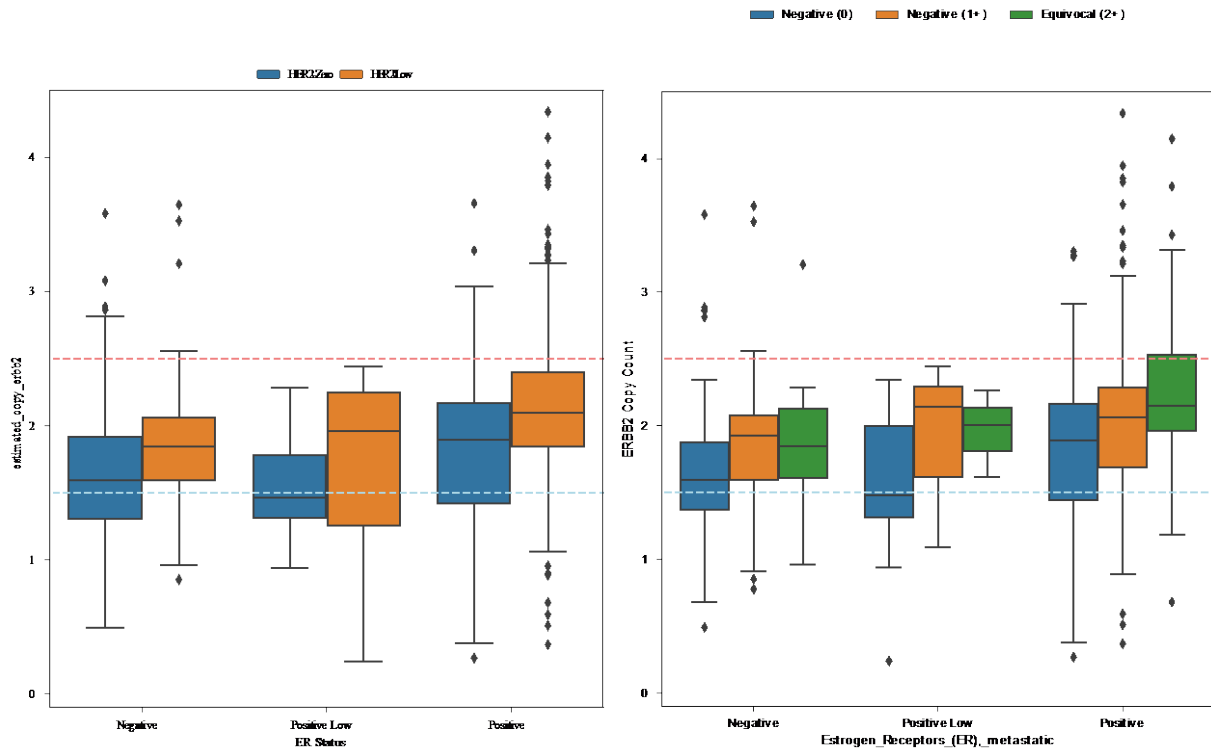

**Supplementary Fig. 4. Comparison of ERBB2 copy counts between HER2-low and HER2-0 tumors among patients with metastatic disease at time of tissue collection (N = 575).**

The left panel depicts the estimated copy count of ERBB2 by ER status and HER2 status. The blue line depicts the point at which HER2 would be called a 1-copy loss and the red line depicts the point at which it would be called a gain. On the right, a similar plot is shown, except colored by IHC staining for HER2. Box plots are constructed with the central line as the median, the outer lines of the box as the lower and upper quartile, and whiskers are equal to 1.5x the closest quartile.

**HER2, human epidermal growth factor receptor 2; IHC, immunohistochemistry**

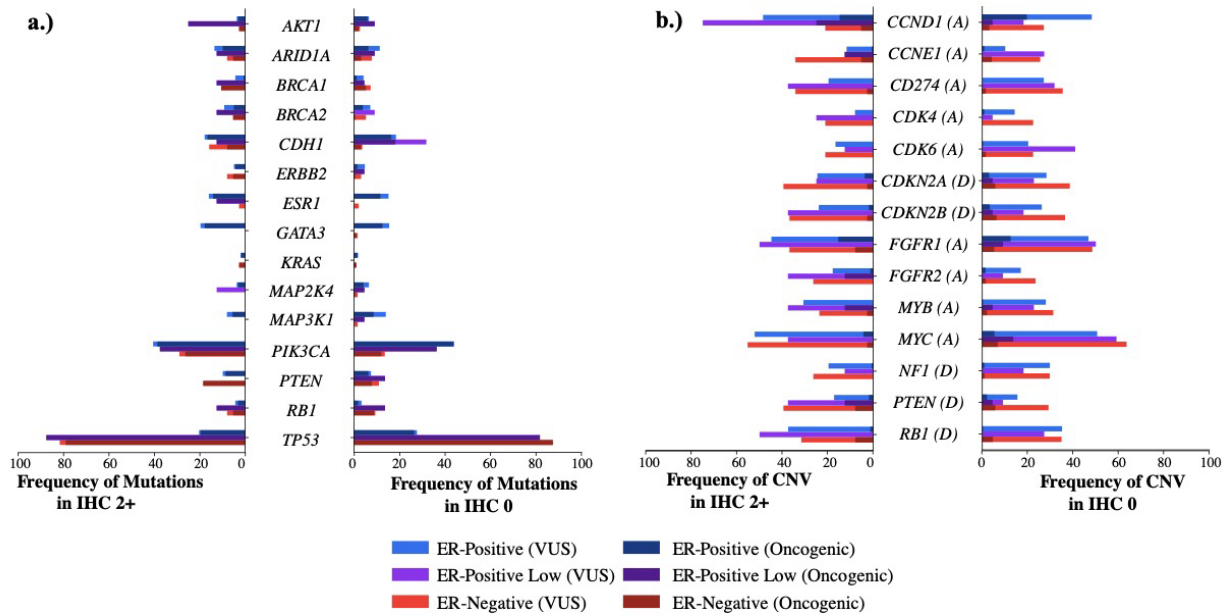

**Supplementary Fig. 5. Frequency of most common mutations (a.) and copy number variations (b.) among patients with that were either IHC 0 or 2+ at time of sample collection (N = 759), divided by IHC (HER2) status and colored by ER status.**

Shading represents the percentage of oncogenic events. In the right panel, an annotation of "(A)" beside a gene represents high amplification and "(D)" represents a deep or 2 copy deletion.

**HER2**, human epidermal growth factor receptor 2; **ER**, estrogen receptor

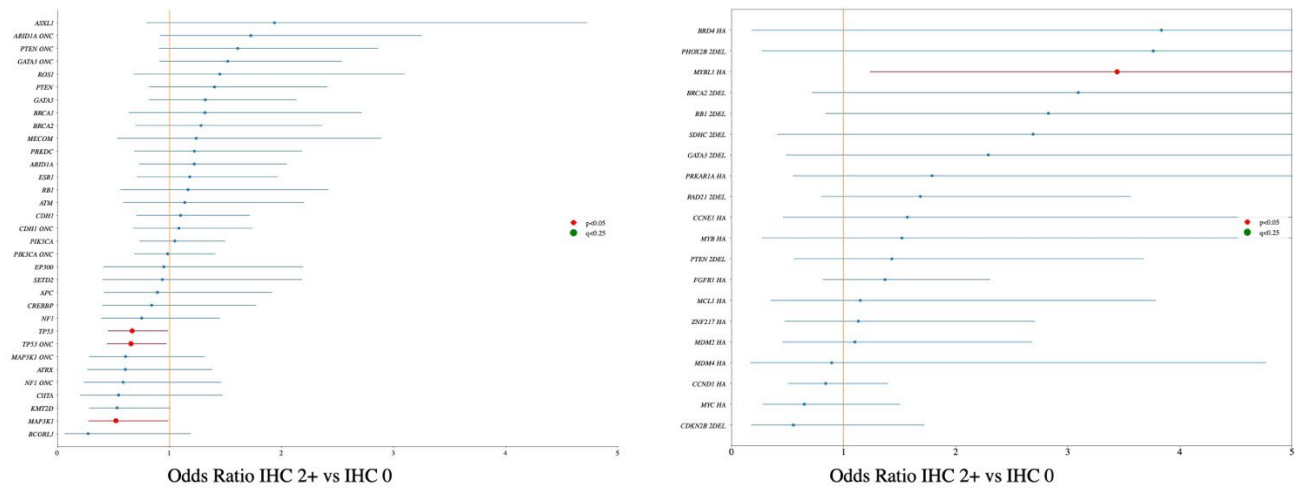

**Supplementary Fig. 6. Enrichment analysis of mutations (left) and copy number variation (CNV, right) among patients with either IHC 0 or 2+ at time of tissue collection (N = 750).**

Modeling was done using multivariate logistic regression accounting for ER status and background rate of either mutation or copy-number events, using the statsmodel package in Python. ER-low cases were included in the ER-positive group. Multiple hypothesis correction was done using FDR. Only models that reached a significant value under multiple hypothesis correction for rejecting the log-likelihood null were included, as well as those that converged after 500 iterations. Only mutations that appeared in over 4% of either all HER2-0 or HER2-low samples were included in this visualization. On the left, lines labeled “\_ONC” represent only oncogenic mutations, while the CNVs were done on 2DELS or high amplifications for tumor suppressor genes and oncogenes, respectively (labeled on the figure). Error bars are reported as the 95% confidence interval. P-values are determined as the likelihood of the model’s calculated coefficients under the assumption that the true coefficients are 0 and are reported as two-tailed. Multiple hypothesis correction was done using BH-FDR. Exact p-values are reported in the source data of this figure.

**CNV**, copy number variations; **ER**, estrogen receptor; **HER2**, human epidermal growth factor receptor 2

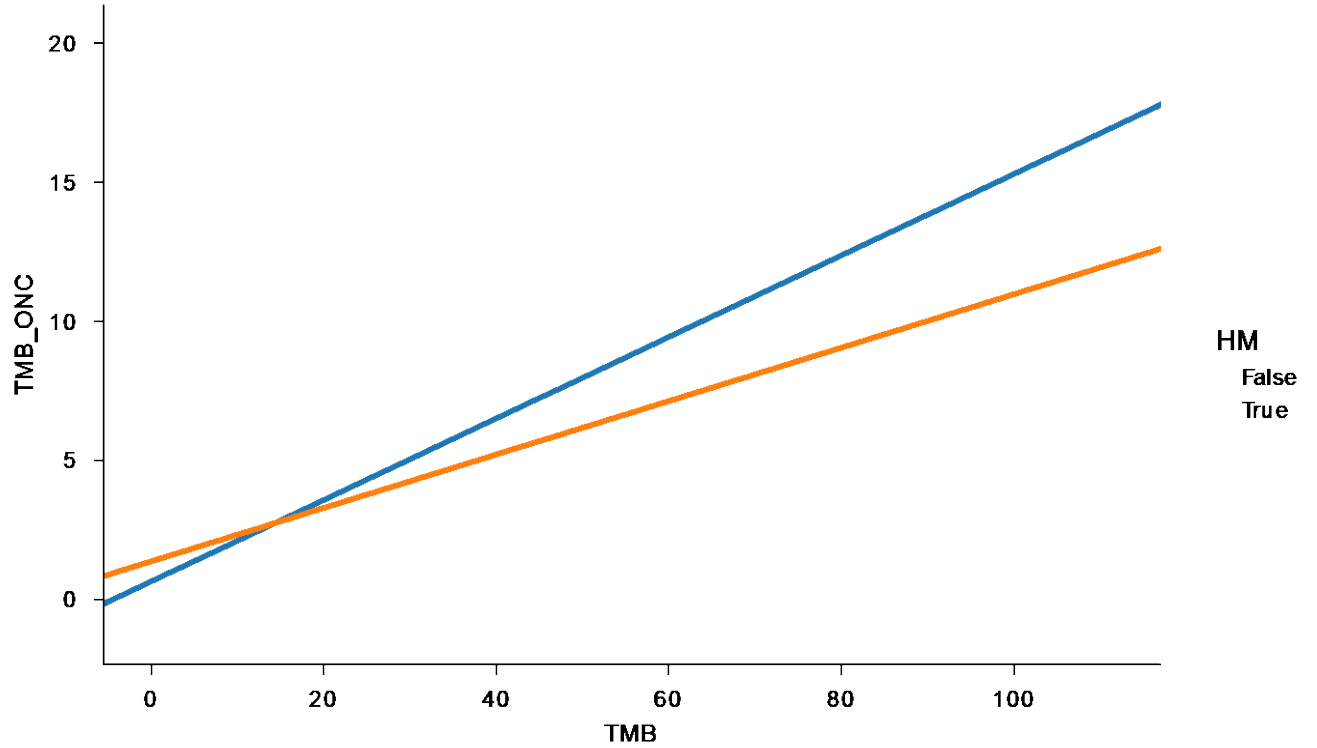

**Supplementary Fig. 7. A plot of total TMB versus TMB that only resulted in an oncogenic mutation, colored by hypermutant status.**

The estimated linear model depicts that, at lower number of total mutations, a higher proportion of the mutations are expected to be oncogenic. In particular, the slope of the hypermutant-estimated linear model diverges from the non-hypermutant, suggesting that this term should be included in the regression models.

**TMB**, tumor mutational burden



|                                                                                                                                    | Total Population<br>(n=1039) | Patients with HER2-<br>Low Tumors Tested<br>(n=487) | Patients with HER2-0<br>Tumors Tested<br>(n=552) | P-Value |
|------------------------------------------------------------------------------------------------------------------------------------|------------------------------|-----------------------------------------------------|--------------------------------------------------|---------|
| <b>CNS Brain diagnosis, n (%)</b>                                                                                                  | 267 (25.7)                   | 111 (22.8)                                          | 156 (28.3)                                       | 0.044   |
| <b>Brain mets at time of initial met diagnosis, n (%)</b>                                                                          | 75 (7.2)                     | 25 (5.1)                                            | 50 (9.1)                                         | 0.015   |
| <b>Lung mets at time of initial met diagnosis, n (%)</b>                                                                           | 216 (20.8)                   | 94 (19.3)                                           | 122 (22.1)                                       | 0.267   |
| <b>Liver mets at time of initial met diagnosis, n (%)</b>                                                                          | 286 (27.5)                   | 118 (24.2)                                          | 168 (30.4)                                       | 0.025   |
| <b>Bone mets at time of initial met diagnosis, n (%)</b>                                                                           | 593 (57.1)                   | 275 (56.5)                                          | 318 (57.6)                                       | 0.711   |
| <b>Other mets at time of initial met diagnosis, n (%)</b>                                                                          | 635 (61.1)                   | 301 (61.8)                                          | 334 (60.5)                                       | 0.668   |
| <b># Sites diagnosed at time of metastatic diagnosis, n (%)</b>                                                                    | -                            | -                                                   | -                                                | 0.394   |
| 1                                                                                                                                  | 395 (38.0)                   | 195 (40.0)                                          | 200 (36.2)                                       | -       |
| 2                                                                                                                                  | 351 (33.8)                   | 166 (34.1)                                          | 185 (33.5)                                       | -       |
| 3                                                                                                                                  | 191 (18.4)                   | 84 (17.3)                                           | 107 (19.4)                                       | -       |
| 4+                                                                                                                                 | 102 (9.8)                    | 42 (8.6)                                            | 60 (10.9)                                        | -       |
| <b>Received prior neo/adjuvant chemotherapy, n (%)*</b>                                                                            | 617 (77.7)                   | 271 (74.7)                                          | 346 (80.3)                                       | 0.06    |
| <b>Received prior neo/adjuvant endocrine treatment, n (%)*</b>                                                                     | 512 (64.5)                   | 258 (71.1)                                          | 254 (58.9)                                       | 4E-04   |
| <b>Received prior neo/adjuvant anti-HER2 treatment, n (%)*</b>                                                                     | 18 (2.3)                     | 9 (2.5)                                             | 9 (2.1)                                          | 0.71    |
| <b>Metastatic Regimen Count at time of OncoPanel testing, median (min, max)**</b>                                                  | 0 (0, 10)                    | 0 (0, 10)                                           | 0 (0, 10)                                        | 0.009   |
| <b>Prior Treatments Received for metastatic disease at time of OncoPanel testing, n (%)</b>                                        | -                            | -                                                   | -                                                | -       |
| Endocrine Therapy                                                                                                                  | 513 (49.4)                   | 259 (53.2)                                          | 254 (46.0)                                       | 0.02    |
| Alpelisib                                                                                                                          | 3 (0.3)                      | 1 (0.2)                                             | 2 (0.4)                                          | 0.63    |
| Everolimus                                                                                                                         | 35 (3.4)                     | 22 (4.5)                                            | 13 (2.4)                                         | 0.05    |
| Immunotherapy                                                                                                                      | 21 (2.0)                     | 11 (2.3)                                            | 10 (1.8)                                         | 0.60    |
| CDK4/6                                                                                                                             | 137 (13.2)                   | 70 (14.4)                                           | 67 (12.1)                                        | 0.28    |
| Chemotherapy                                                                                                                       | 604 (58.1)                   | 273 (56.1)                                          | 331 (60.0)                                       | 0.20    |
| ADC1                                                                                                                               | 7 (0.7)                      | 3 (0.6)                                             | 4 (0.7)                                          | 0.83    |
| *Excludes those with Stage IV de-novo                                                                                              |                              |                                                     |                                                  |         |
| **Excludes those with Procedure Dates Before Metastatic Diagnosis                                                                  |                              |                                                     |                                                  |         |
| <b>HER2</b> , human epidermal growth factor receptor 2; <b>CDK</b> , cyclin dependent kinase; <b>ADC</b> , antibody-drug conjugate |                              |                                                     |                                                  |         |

**Supplementary Table 1.** Extended patient and tumor characteristics among patients with metastatic breast cancer included in the study.

|          |         |          |        |         |          |          |
|----------|---------|----------|--------|---------|----------|----------|
| ACTG1    | CDKN1B  | ERCC6    | INHA   | NF2     | RAD51B   | SOCS3    |
| AJUBA    | CDKN1C  | ERF      | INHBA  | NFKBIA  | RAD51C   | SOX17    |
| ALOX12B  | CDKN2A  | ERRF1    | INPP4B | NFKBIE  | RAD51D   | SOX9     |
| AMER1    | CDKN2B  | ESCO2    | INPPL1 | NKX3-1  | RASA1    | SP140    |
| ANKRD11  | CDKN2C  | ETAA1    | IRF1   | NOTCH1  | RB1      | SPEN     |
| APC      | CEBPA   | ETV6     | IRF8   | NOTCH2  | RBL2     | SPOP     |
| APLNR    | CHEK1   | EXT1     | JAK1   | NOTCH3  | RBM10    | SPRED1   |
| ARHGAP35 | CHEK2   | EXT2     | JARID2 | NOTCH4  | RBM15    | SPRTN    |
| ARID1A   | CIC     | EZH2     | KAT6B  | NPM1    | RECQL    | STAG1    |
| ARID1B   | CIITA   | FAM175A  | KDM5C  | NPRL2   | RECQL4   | STAG2    |
| ARID2    | CMTR2   | FAM46C   | KDM6A  | NPRL3   | RELA     | STK11    |
| ARID3A   | COL7A1  | FAM58A   | KDM6B  | NSD1    | REST     | SUFU     |
| ARID4A   | CRBN    | FANCA    | KEAP1  | NTHL1   | RHOH     | SUZ12    |
| ARID4B   | CREBBP  | FANCB    | KLF2   | P2RY8   | RNF43    | TBL1XR1  |
| ARID5B   | CRTC2   | FANCC    | KLF4   | PALB2   | ROBO1    | TBX3     |
| ASXL1    | CTCF    | FANCD2   | KMT2A  | PARK2   | RTEL1    | TCF3     |
| ASXL2    | CTNNA1  | FANCE    | KMT2B  | PARP1   | RUNX1    | TCF7L2   |
| ATM      | CTR9    | FANCF    | KMT2C  | PAX5    | RYBP     | TET1     |
| ATP6V1B2 | CUL3    | FANCG    | KMT2D  | PBRM1   | SAMHD1   | TET2     |
| ATR      | CUX1    | FANCI    | LATS1  | PDS5B   | SBDS     | TET3     |
| ATRX     | CYLD    | FANCL    | LATS2  | PHF6    | SDHA     | TGFBR1   |
| ATXN2    | DAXX    | FANCM    | LRP5   | PHOX2B  | SDHAF2   | TGFBR2   |
| AXIN1    | DDB2    | FAS      | LTB    | PIGA    | SDHB     | TMEM127  |
| AXIN2    | DDX3X   | FAT1     | LZTR1  | PIK3R1  | SDHC     | TNFAIP3  |
| B2M      | DDX41   | FBXO11   | MAD2L2 | PIK3R2  | SDHD     | TNFRSF14 |
| BACH2    | DEPDC5  | FBXW7    | MAP2K4 | PIK3R3  | SERPINB3 | TOP1     |
| BAP1     | DICER1  | FH       | MAP3K1 | PMAIP1  | SESN1    | TP53     |
| BARD1    | DIS3    | FLCN     | MAX    | PML     | SESN2    | TP53BP1  |
| BBC3     | DIS3L2  | FOXA1    | MBD4   | PMS1    | SESN3    | TP63     |
| BCL10    | DKC1    | FOXF1    | MBD6   | PMS2    | SETD2    | TRAF3    |
| BCL11B   | DNMT3A  | FOXL2    | MED12  | POLB    | SETDB1   | TRAF5    |
| BCL2L11  | DNMT3B  | FOXO1    | MEN1   | POLD1   | SETDB2   | TRIP13   |
| BCOR     | DTX1    | FOXP1    | MGA    | POLE    | SFRP1    | TSC1     |
| BCORL1   | DUSP22  | FUBP1    | MITF   | POLH    | SFRP2    | TSC2     |
| BLM      | DUSP4   | GATA3    | MLH1   | POLQ    | SH2B3    | VHL      |
| BMPR1A   | ECT2L   | GATA4    | MLH3   | POT1    | SH2D1A   | WIF1     |
| BRCA1    | EED     | GATA6    | MLL2   | PPP2R1A | SHQ1     | WRN      |
| BRCA2    | EGR1    | GPC3     | MOB3B  | PPP2R2A | SLC34A2  | WT1      |
| BRCC3    | ELF3    | GPS2     | MRE11A | PPP6C   | SLFN11   | XPA      |
| BRIP1    | ELMSAN1 | GRIN2A   | MSH2   | PRDM1   | SLX4     | XPC      |
| BTG1     | EP300   | HDAC4    | MSH3   | PTCH1   | SMAD2    | XRCC1    |
| CASP8    | EP400   | HIST1H1B | MSH6   | PTEN    | SMAD3    | XRCC2    |
| CBFA2T3  | EPCAM   | HIST1H1D | MST1   | PTPN1   | SMAD4    | XRCC3    |
| CBFB     | EPHA3   | HLA-A    | MTAP   | PTPN2   | SMARCA2  | XRCC4    |
| CBL      | EPHA7   | HLA-B    | MUTYH  | PTPRD   | SMARCA4  | XRCC5    |
| CD58     | EPHB1   | HLA-C    | NBN    | PTPRS   | SMARCB1  | XRCC6    |
| CDC73    | ERCC1   | HNF1A    | NCOR1  | PTPRT   | SMARCE1  | YWHAE    |
| CDH1     | ERCC2   | HOXB13   | NEIL1  | QKI     | SMC1A    | ZBTB20   |
| CDH4     | ERCC3   | ID3      | NEIL2  | RAD21   | SMC3     | ZFH3     |
| CDK12    | ERCC4   | IFNGR1   | NEIL3  | RAD50   | SMG1     | ZFP36L1  |
| CDKN1A   | ERCC5   | IKZF3    | NF1    | RAD51   | SOCS1    | ZNRF3    |

**Supplementary Table 2. List of tumor suppressor genes that are further used to classify oncogenic mutations.**

This list of genes was curated by a board-certified geneticist and a loss of function mutation in these genes was determined to be oncogenic.
