# Supplementary material for: Comprehensive genomic characterization of HER2-low and HER2-0 breast cancer
Source: PubMed Central journal article supplement (PMC10657399; doi:10.1038/s41467-023-43324-w), 2023-11-18
Supplement: 41467_2023_43324_MOESM3_ESM.pdf [file 41467_2023_43324_MOESM3_ESM.pdf]

## **Description of Additional Supplementary Files**

**File Name:** Supplementary Data 1

**Description:** Results of enrichment logistic regression. Included q-values were calculated separately for mutation and copy number events.
